# Supplementary material for: Hansenia weberbaueriana (Fedde ex H.Wolff) Pimenov & Kljuykov Extract Suppresses Proliferation of HepG2 Cells via the PTEN-PI3K-AKT Pathway Uncovered by Integrating Network Pharmacology and Iin Vitro Experiments
Source: Front Pharmacol. 2021 Apr 20;12:620897. doi: 10.3389/fphar.2021.620897 (PMC8097175; doi:10.3389/fphar.2021.620897)
Supplement: Supplementary file 4 [file datasheet1.csv]

Id	Label	Degree	Betweenness	Expression
6714	SRC	218	112228.86	0
207	AKT1	182	83834.7	0
7316	UBC	178	203317.47	0
3320	HSP90AA1	167	99289.4	0
1387	CREBBP	167	50849.59	0
3065	HDAC1	166	58650.35	0
2033	EP300	163	47612.65	0
983	CDK1	159	59523.49	0
1017	CDK2	153	50204.78	0
5594	MAPK1	146	42370.36	0
1432	MAPK14	127	48887.91	0
1956	EGFR	127	44159.38	0
2534	FYN	126	29646	0
387	RHOA	119	45532.14	0
5290	PIK3CA	112	38934.2	0
3725	JUN	110	30016.55	0
3066	HDAC2	110	24102.2	0
5599	MAPK8	109	25035.84	0
6774	STAT3	108	35256.29	0
2099	ESR1	106	39755.7	0
5595	MAPK3	105	18477.94	0
367	AR	99	36745.14	0
5347	PLK1	95	18908.94	0
3932	LCK	95	17455.38	0
8841	HDAC3	93	14793.55	0
3717	JAK2	92	22213.12	0
891	CCNB1	87	14777.93	0
8850	KAT2B	85	15492.63	0
5970	RELA	84	26216	0
25	ABL1	84	17702.36	0
3312	HSPA8	81	22869.79	0
2475	MTOR	77	26302.64	0
3716	JAK1	77	10589.05	0
5566	PRKACA	76	41310.71	0
1019	CDK4	76	10885.76	0
5578	PRKCA	73	23581.28	0
2932	GSK3B	71	18109.36	0
3326	HSP90AB1	70	11815.46	0
6850	SYK	70	7732.98	0
5600	MAPK11	70	6890.76	0
7525	YES1	70	4380.23	0
7341	SUMO1	65	14683.47	0
5294	PIK3CG	64	6939.51	0
595	CCND1	63	10739.8	0
5291	PIK3CB	63	5971.45	0
7157	TP53	61	12996.73	0
4893	NRAS	61	4571.26	0
5894	RAF1	60	7640.47	0
5293	PIK3CD	59	5805.03	0
5159	PDGFRB	58	6862.24	0
2064	ERBB2	58	6301.1	0
6885	MAP3K7	57	11758.43	0
3480	IGF1R	56	9506.57	0
3718	JAK3	56	3923.42	0
1111	CHEK1	55	13116.84	0
3551	IKBKB	55	9671.79	0
545	ATR	55	8197.55	0
596	BCL2	54	16119.1	0
5591	PRKDC	53	14670.48	0
2773	GNAI3	52	30015.11	0
1024	CDK8	51	10964.53	0
1020	CDK5	51	8740.08	0
1147	CHUK	51	8566.89	0
3815	KIT	51	5672.85	0
3265	HRAS	51	3372.9	0
2770	GNAI1	50	29242.63	0
9734	HDAC9	50	5530.12	0
5879	RAC1	49	4317.83	0
3791	KDR	48	6077.45	0
3091	HIF1A	47	9738.43	0
6198	RPS6KB1	47	7168.24	0
472	ATM	46	4238.47	0
6790	AURKA	45	6496.59	0
1457	CSNK2A1	44	10406.36	0
5580	PRKCD	44	4624.22	0
3055	HCK	44	2102.12	0
10014	HDAC5	44	2051.38	0
2885	GRB2	44	1818.77	0
836	CASP3	43	6275.2	0
7184	HSP90B1	43	4590.7	0
1499	CTNNB1	42	6532.64	0
5170	PDPK1	42	6068.91	0
1445	CSK	42	4446.22	0
5468	PPARG	42	4352.13	0
5693	PSMB5	42	4044.62	0
9212	AURKB	42	3641.02	0
890	CCNA2	42	2420.54	0
4233	MET	41	2898.46	0
5601	MAPK9	41	1739.04	0
8900	CCNA1	41	651.91	0
5581	PRKCE	40	8886.51	0
993	CDC25A	40	4998.05	0
6464	SHC1	40	3415.31	0
6654	SOS1	40	1175.22	0
5604	MAP2K1	39	3515.49	0
3643	INSR	39	3208.13	0
598	BCL2L1	38	6471.97	0
8658	TNKS	38	3199.07	0
208	AKT2	38	2897.06	0
5602	MAPK10	38	2051.06	0
5781	PTPN11	38	1541.59	0
5603	MAPK13	38	1521.28	0
9133	CCNB2	38	1199.66	0
4790	NFKB1	37	7365.79	0
5770	PTPN1	37	5039.83	0
7514	XPO1	37	4643.97	0
5914	RARA	37	4227.15	0
898	CCNE1	37	1441.18	0
346562	GNAT3	37	1224.97	0
351	APP	36	15086	0
3164	NR4A1	36	5749.25	0
80351	TNKS2	36	2489.05	0
2185	PTK2B	36	2113.83	0
673	BRAF	36	1866.51	0
3309	HSPA5	35	7796.3	0
6667	SP1	35	5017.09	0
23097	CDK19	35	3149.61	0
2908	NR3C1	34	2571.26	0
2353	FOS	34	2138.25	0
5925	RB1	33	4188.28	0
7297	TYK2	33	2587.53	0
6772	STAT1	33	2340.63	0
5979	RET	33	2020.81	0
2769	GNA15	32	6646.37	0
7046	TGFBR1	32	5440.91	0
2776	GNAQ	32	5246.63	0
4217	MAP3K5	32	5182.52	0
998	CDC42	32	3909.77	0
6233	RPS27A	32	3784.35	0
1969	EPHA2	32	3405.26	0
11200	CHEK2	32	2300.49	0
1454	CSNK1E	32	1554.34	0
9759	HDAC4	32	1168.63	0
1018	TEN1-CDK3	32	550.12	0
5330	PLCB2	31	5523.68	0
3611	ILK	31	5337.99	0
23236	PLCB1	31	5053.78	0
4609	MYC	31	4823.93	0
4067	LYN	31	2210.24	0
867	CBL	31	477.48	0
4851	NOTCH1	30	5839.05	0
6446	SGK1	30	4740.43	0
5331	PLCB3	30	4416.64	0
7430	EZR	30	3607.66	0
3667	IRS1	30	1371.89	0
5335	PLCG1	30	1250.26	0
2735	GLI1	29	10498.58	0
4792	NFKBIA	29	4158.32	0
892	CCNC	29	3997.91	0
9630	GNA14	29	3987.48	0
331	XIAP	29	3216.15	0
7314	UBB	29	3210.03	0
5465	PPARA	29	2864.35	0
1026	CDKN1A	29	2207.34	0
2048	EPHB2	29	1641.75	0
1453	CSNK1D	29	1484.53	0
10563	CXCL13	29	618.56	0
6622	SNCA	28	9220.61	0
1025	CDK9	28	6310.42	0
7099	TLR4	28	5172.65	0
142	PARP1	28	4237.47	0
2767	GNA11	28	3835.91	0
5422	POLA1	28	2683.65	0
8318	CDC45	28	2543.11	0
7534	YWHAZ	28	2311.79	0
9612	NCOR2	28	1399.13	0
6776	STAT5A	28	1211.58	0
7421	VDR	27	1942.12	0
83933	HDAC10	27	1584.56	0
6195	RPS6KA1	27	1332.3	0
6777	STAT5B	27	835.57	0
5663	PSEN1	26	5552.86	0
7010	TEK	26	1638.53	0
995	CDC25C	26	1420.27	0
5829	PXN	26	901.13	0
51564	HDAC7	26	759.13	0
896	CCND3	26	707.8	0
2268	FGR	26	700.9	0
4088	SMAD3	25	4599.2	0
5579	PRKCB	25	4059.94	0
7132	TNFRSF1A	25	2730.21	0
4137	MAPT	25	2452.66	0
5515	PPP2CA	25	2445.72	0
2047	EPHB1	25	988.6	0
994	CDC25B	25	944.63	0
8317	CDC7	25	766.63	0
2321	FLT1	25	641.54	0
1398	CRK	25	548.85	0
4170	MCL1	24	2204.55	0
857	CAV1	24	2023.38	0
7189	TRAF6	24	1503.82	0
7531	YWHAE	24	1206.14	0
2100	ESR2	24	923.84	0
4914	NTRK1	23	2404.24	0
5138	PDE2A	23	2386.52	0
10454	TAB1	23	2323.39	0
5590	PRKCZ	23	2131.55	0
5111	PCNA	23	2103.15	0
23028	KDM1A	23	1848.99	0
9611	NCOR1	23	690.03	0
154	ADRB2	22	6798.04	0
5499	PPP1CA	22	3519.75	0
7015	TERT	22	3397.53	0
6197	RPS6KA3	22	2045.25	0
50940	PDE11A	22	1869.37	0
10846	PDE10A	22	1869.37	0
23411	SIRT1	22	1786.31	0
5588	PRKCQ	22	1237.4	0
5156	PDGFRA	22	1071.23	0
5881	RAC3	22	1005.5	0
6778	STAT6	22	992.12	0
7067	THRA	22	886.83	0
7533	YWHAH	22	865.17	0
10926	DBF4	22	310.82	0
3702	ITK	22	277.1	0
3741	KCNA5	21	12515.62	0
2736	GLI2	21	2417.42	0
5728	PTEN	21	1641.79	0
7311	UBA52	21	1498.27	0
5241	PGR	21	1401.3	0
8202	NCOA3	21	1072.09	0
1869	E2F1	21	869.23	0
6258	RXRG	21	825.22	0
7529	YWHAB	21	679.69	0
5605	MAP2K2	21	356.27	0
5058	PAK1	20	2886.04	0
6196	RPS6KA2	20	1070.83	0
120892	LRRK2	20	1068.63	0
4929	NR4A2	20	1058.43	0
1027	CDKN1B	20	1011.37	0
672	BRCA1	20	916.15	0
3303	HSPA1A	20	665.52	0
10971	YWHAQ	20	600.32	0
8648	NCOA1	20	537.8	0
1021	CDK6	20	329.17	0
5571	PRKAG1	19	8391.39	0
5152	PDE9A	19	8030.45	0
4214	MAP3K1	19	1549.63	0
8767	RIPK2	19	1412	0
2324	FLT4	19	912.31	0
1386	ATF2	19	703.46	0
8654	PDE5A	19	665.05	0
3172	HNF4A	19	663.86	0
2042	EPHA3	19	603.99	0
3845	KRAS	19	252.97	0
4690	NCK1	19	142.21	0
409	ARRB2	18	2781.14	0
2260	FGFR1	18	1946.02	0
1385	CREB1	18	1884.05	0
5567	PRKACB	18	1620.65	0
2810	SFN	18	1175.7	0
5300	PIN1	18	1023.58	0
11140	CDC37	18	965.21	0
89780	WNT3A	18	941.07	0
1452	CSNK1A1	18	939.24	0
1947	EFNB1	18	808.54	0
840	CASP7	18	760.47	0
3738	KCNA3	18	485.5	0
894	CCND2	18	121.92	0
9134	CCNE2	18	107.77	0
55869	HDAC8	18	37	0
7150	TOP1	17	4200.09	0
7422	VEGFA	17	3434.18	0
408	ARRB1	17	3344.51	0
2597	GAPDH	17	2847.41	0
4804	NGFR	17	1790.12	0
8431	NR0B2	17	1727.48	0
2308	FOXO1	17	1600.41	0
3297	HSF1	17	1229.92	0
25942	SIN3A	17	1025.06	0
2931	GSK3A	17	1012.72	0
4194	MDM4	17	1006.73	0
7532	YWHAG	17	494.2	0
1942	EFNA1	17	486.33	0
10733	PLK4	17	464.47	0
5144	PDE4D	17	452.69	0
3174	HNF4G	17	410.65	0
5469	MED1	17	394.3	0
5747	PTK2	17	379.49	0
7068	THRB	17	224.27	0
990	CDC6	17	149.91	0
5340	PLG	16	9666.11	0
5563	PRKAA2	16	2867.07	0
1759	DNM1	16	1876.57	0
5906	RAP1A	16	1863.27	0
904	CCNT1	16	1749.44	0
5568	PRKACG	16	1361.07	0
185	AGTR1	16	1086.91	0
841	CASP8	16	762.36	0
10131	TRAP1	16	620.46	0
2043	EPHA4	16	432.19	0
1946	EFNA5	16	412.53	0
2041	EPHA1	16	321.47	0
2549	GAB1	16	245.47	0
10499	NCOA2	16	187.95	0
9846	GAB2	16	40.39	0
3757	KCNH2	15	9099.52	0
5664	PSEN2	15	2175.03	0
6915	TBXA2R	15	1704.27	0
4780	NFE2L2	15	1168.68	0
2309	FOXO3	15	922.7	0
10399	RACK1	15	728.02	0
8454	CUL1	15	574.2	0
5921	RASA1	15	435.47	0
2045	EPHA7	15	426.04	0
7465	WEE1	15	358.97	0
5142	PDE4B	15	230.02	0
5143	PDE4C	15	230.02	0
6237	RRAS	15	202.96	0
8651	SOCS1	15	177.06	0
10013	HDAC6	15	171.42	0
1788	DNMT3A	15	150.38	0
7027	TFDP1	15	114.77	0
56923	NMUR2	14	3923.11	0
7415	VCP	14	2610.29	0
6469	SHH	14	2338.39	0
5606	MAP2K3	14	2287.71	0
7153	TOP2A	14	1456.47	0
5338	PLD2	14	1174.71	0
29110	TBK1	14	905.78	0
6500	SKP1	14	836.19	0
4751	NEK2	14	665.48	0
7321	UBE2D1	14	542.89	0
2044	EPHA5	14	426.04	0
5933	RBL1	14	327.81	0
4208	MEF2C	14	305.89	0
4205	MEF2A	14	287.84	0
1022	CDK7	14	285.72	0
5928	RBBP4	14	273.92	0
2049	EPHB3	14	171.81	0
5336	PLCG2	14	121.24	0
8440	NCK2	14	99.43	0
4313	MMP2	13	6292.64	0
4846	NOS3	13	2553.98	0
1948	EFNB2	13	1881.81	0
2280	FKBP1A	13	1332.83	0
3689	ITGB2	13	1321.16	0
7528	YY1	13	1094.92	0
2902	GRIN1	13	820.68	0
23385	NCSTN	13	746.78	0
2322	FLT3	13	571.8	0
57521	RPTOR	13	454.36	0
8945	BTRC	13	424.71	0
3308	HSPA4	13	376.48	0
1910	EDNRB	13	361.48	0
10000	AKT3	13	347.78	0
4209	MEF2D	13	346.38	0
7186	TRAF2	13	300.91	0
7409	VAV1	13	212.07	0
8204	NRIP1	13	207.34	0
8660	IRS2	13	184.74	0
9021	SOCS3	13	179.61	0
1871	E2F3	13	71.58	0
79837	PIP4K2C	13	68.28	0
3784	KCNQ1	12	3118.17	0
156	GRK2	12	1734.51	0
338	APOB	12	1350.63	0
1958	EGR1	12	1338.52	0
623	BDKRB1	12	917.55	0
114	ADCY8	12	833.74	0
111	ADCY5	12	833.74	0
999	CDH1	12	719.15	0
2247	FGF2	12	692.49	0
1459	CSNK2A2	12	686.34	0
5371	PML	12	658.36	0
109	ADCY3	12	623.56	0
113	ADCY7	12	574.11	0
5292	PIM1	12	522.75	0
1978	EIF4EBP1	12	416.98	0
1855	DVL1	12	358.65	0
4089	SMAD4	12	302.34	0
4087	SMAD2	12	287.61	0
1051	CEBPB	12	263.54	0
4012	LNPEP	12	242.57	0
3727	JUND	12	229.59	0
1949	EFNB3	12	217.05	0
5934	RBL2	12	176.82	0
5931	RBBP7	12	125.68	0
5150	PDE7A	12	107.51	0
996	CDC27	12	99.09	0
3572	IL6ST	12	75.69	0
991	CDC20	12	52.71	0
4318	MMP9	11	3102.45	0
4842	NOS1	11	1186.47	0
5610	EIF2AK2	11	799.69	0
4615	MYD88	11	747.69	0
10657	KHDRBS1	11	700.78	0
5062	PAK2	11	678.38	0
3146	HMGB1	11	647.72	0
2263	FGFR2	11	614.07	0
1856	DVL2	11	589.62	0
6721	SREBF2	11	588.15	0
2775	GNAO1	11	577.21	0
902	CCNH	11	550.69	0
196	AHR	11	546.52	0
2305	FOXM1	11	422.88	0
5467	PPARD	11	385.86	0
115	ADCY9	11	329.58	0
112	ADCY6	11	329.58	0
196883	ADCY4	11	329.58	0
108	ADCY2	11	329.58	0
2847	MCHR1	11	327.12	0
1326	MAP3K8	11	288.1	0
332	BIRC5	11	285.04	0
7329	UBE2I	11	267.63	0
51135	IRAK4	11	230.85	0
1436	CSF1R	11	211.52	0
5731	PTGER1	11	207.73	0
8826	IQGAP1	11	158.14	0
25759	SHC2	11	152.34	0
4605	MYBL2	11	96.95	0
7249	TSC2	11	80	0
1843	DUSP1	11	70.84	0
4172	MCM3	11	43.44	0
1943	EFNA2	11	41.02	0
1945	EFNA4	11	41.02	0
148	ADRA1A	11	33.18	0
1870	E2F2	11	6.99	0
2147	F2	10	6309.08	0
823	CAPN1	10	4168.56	0
729230	CCR2	10	4080.35	0
7134	TNNC1	10	3219.94	0
7137	TNNI3	10	3219.94	0
7139	TNNT2	10	3219.94	0
960	CD44	10	3119.61	0
7225	TRPC6	10	2336	0
1232	CCR3	10	1749.44	0
10054	UBA2	10	949.39	0
10524	KAT5	10	899.07	0
887	CCKBR	10	844.78	0
834	CASP1	10	836.58	0
4092	SMAD7	10	807.78	0
6232	RPS27	10	797.14	0
3064	HTT	10	751.8	0
2065	ERBB3	10	664.3	0
5577	PRKAR2B	10	495.39	0
5705	PSMC5	10	478.45	0
60	ACTB	10	346.19	0
3014	H2AFX	10	310.97	0
3832	KIF11	10	291.02	0
572	BAD	10	236.96	0
6613	SUMO2	10	199.33	0
10188	TNK2	10	198.61	0
10273	STUB1	10	183.34	0
2050	EPHB4	10	175.77	0
23054	NCOA6	10	167.47	0
7535	ZAP70	10	167.38	0
2547	XRCC6	10	143.15	0
5908	RAP1B	10	142.12	0
695	BTK	10	133.79	0
9402	GRAP2	10	118.29	0
1108	CHD4	10	100.02	0
4654	MYOD1	10	79.14	0
5880	RAC2	10	76.81	0
9219	MTA2	10	74.27	0
7764	ZNF217	10	74.27	0
9564	BCAR1	10	70.04	0
1874	E2F4	10	61.22	0
1399	CRKL	10	56.96	0
7376	NR1H2	10	55.58	0
85417	CCNB3	10	50.6	0
147	ADRA1B	10	39.2	0
1944	EFNA3	10	35.88	0
7029	TFDP2	10	32.22	0
5771	PTPN2	10	28.65	0
4998	ORC1	10	21.14	0
79885	HDAC11	10	21.12	0
4173	MCM4	10	19.29	0
4171	MCM2	10	16.65	0
868	CBLB	10	16.46	0
51343	FZR1	10	10.86	0
1576	CYP3A4	9	9439.96	0
32	ACACB	9	5823.19	0
4312	MMP1	9	4627.99	0
3708	ITPR1	9	1689.04	0
7040	TGFB1	9	1544.95	0
6794	STK11	9	1128.15	0
10672	GNA13	9	855.13	0
1901	S1PR1	9	746.87	0
5518	PPP2R1A	9	731.14	0
10055	SAE1	9	725.74	0
2081	ERN1	9	708.86	0
5564	PRKAB1	9	657.81	0
3061	HCRTR1	9	619.98	0
3315	HSPB1	9	468.2	0
3688	ITGB1	9	404.36	0
5576	PRKAR2A	9	373.6	0
5743	PTGS2	9	359.66	0
8569	MKNK1	9	310.35	0
1786	DNMT1	9	294.36	0
6093	ROCK1	9	280.26	0
2146	EZH2	9	269.4	0
1857	DVL3	9	228.19	0
5702	PSMC3	9	223.45	0
7248	TSC1	9	218.9	0
8878	SQSTM1	9	211.8	0
7846	TUBA1A	9	210.87	0
5021	OXTR	9	206.92	0
107	ADCY1	9	188.74	0
3356	HTR2A	9	177.89	0
3726	JUNB	9	174.84	0
6775	STAT4	9	165.91	0
4215	MAP3K3	9	157.75	0
23291	FBXW11	9	155.93	0
7324	UBE2E1	9	148.43	0
1845	DUSP3	9	123.12	0
3516	RBPJ	9	100.09	0
6416	MAP2K4	9	90.32	0
57649	PHF12	9	62.68	0
3622	ING2	9	62.68	0
10933	MORF4L1	9	62.68	0
2887	GRB10	9	41.31	0
4176	MCM7	9	39.5	0
84515	MCM8	9	17.18	0
1796	DOK1	9	15.56	0
10769	PLK2	9	15.23	0
3635	INPP5D	9	15	0
146	ADRA1D	9	13.62	0
4174	MCM5	9	13.49	0
2222	FDFT1	8	23799.27	0
1595	CYP51A1	8	11017.79	0
3283	HSD3B1	8	7591.43	0
3486	IGFBP3	8	6490.26	0
216	ALDH1A1	8	4385.16	0
2149	F2R	8	1591.55	0
84433	CARD11	8	1569.9	0
801	CALM1	8	878.67	0
824	CAPN2	8	709.15	0
2737	GLI3	8	674.22	0
10891	PPARGC1A	8	671.38	0
4316	MMP7	8	499.87	0
1559	CYP2C9	8	484.41	0
29904	EEF2K	8	464.07	0
4221	MEN1	8	358.1	0
4085	MAD2L1	8	322.19	0
7412	VCAM1	8	298.67	0
5689	PSMB1	8	212.21	0
3661	IRF3	8	183.57	0
4988	OPRM1	8	166.89	0
5707	PSMD1	8	151	0
8312	AXIN1	8	134.45	0
317	APAF1	8	131.83	0
1487	CTBP1	8	126.65	0
7283	TUBG1	8	125.32	0
552	AVPR1A	8	119.95	0
6608	SMO	8	117.59	0
6722	SRF	8	107.89	0
5898	RALA	8	105.32	0
23309	SIN3B	8	100.22	0
2624	GATA2	8	99.18	0
8867	SYNJ1	8	97.97	0
6907	TBL1X	8	80.7	0
860	RUNX2	8	80.6	0
5704	PSMC4	8	80.1	0
5701	PSMC2	8	80.1	0
5706	PSMC6	8	80.1	0
8061	FOSL1	8	79.9	0
9314	KLF4	8	77.02	0
3560	IL2RB	8	73.25	0
7704	ZBTB16	8	72.26	0
5695	PSMB7	8	72.14	0
5686	PSMA5	8	72.14	0
5682	PSMA1	8	72.14	0
6502	SKP2	8	71.34	0
653361	NCF1	8	69.13	0
5609	MAP2K7	8	67.48	0
330	BIRC3	8	65.92	0
8737	RIPK1	8	58.63	0
253260	RICTOR	8	42.96	0
3024	HIST1H1A	8	40.37	0
64223	MLST8	8	37.48	0
6095	RORA	8	34.39	0
83464	APH1B	8	31.71	0
2113	ETS1	8	30.34	0
9555	H2AFY	8	30.13	0
6117	RPA1	8	28.14	0
640	BLK	8	24.5	0
1909	EDNRA	8	22.16	0
1875	E2F5	8	21.25	0
80824	DUSP16	8	17.5	0
11221	DUSP10	8	17.5	0
4999	ORC2	8	16.1	0
10062	NR1H3	8	12.79	0
3636	INPPL1	8	9.42	0
2046	EPHA8	8	8.57	0
1263	PLK3	8	6.63	0
11176	BAZ2A	8	6.07	0
3357	HTR2B	8	5.35	0
5737	PTGFR	8	5.35	0
3015	H2AFZ	8	4.92	0
88	ACTN2	7	14326.4	0
2869	GRK5	7	4915.47	0
4985	OPRD1	7	2756.2	0
4035	LRP1	7	2755.13	0
7052	TGM2	7	2590.77	0
3339	HSPG2	7	2150.92	0
2890	GRIA1	7	1589.95	0
5562	PRKAA1	7	775.45	0
2766	GMPR	7	748.02	0
51292	GMPR2	7	748.02	0
1511	CTSG	7	662.63	0
356	FASLG	7	639.72	0
6773	STAT2	7	624.01	0
1230	CCR1	7	614.84	0
81620	CDT1	7	555.98	0
5903	RANBP2	7	404.72	0
7428	VHL	7	356.48	0
388	RHOB	7	354.08	0
4843	NOS2	7	327.28	0
10142	AKAP9	7	317.96	0
4854	NOTCH3	7	314.19	0
2017	CTTN	7	306.3	0
4869	NPM1	7	298.41	0
5582	PRKCG	7	270.72	0
4659	PPP1R12A	7	247.82	0
11315	PARK7	7	214.71	0
10392	NOD1	7	210.2	0
5966	REL	7	205.9	0
5501	PPP1CC	7	198.4	0
2903	GRIN2A	7	164.5	0
23621	BACE1	7	160.14	0
652	BMP4	7	156.25	0
4478	MSN	7	156.15	0
602	BCL3	7	143.09	0
1859	DYRK1A	7	140.49	0
6009	RHEB	7	139.89	0
2114	ETS2	7	122.24	0
80205	CHD9	7	120.62	0
22933	SIRT2	7	90.26	0
10728	PTGES3	7	89.56	0
1994	ELAVL1	7	86.06	0
10910	SUGT1	7	81.84	0
3350	HTR1A	7	79.4	0
573	BAG1	7	73.08	0
1500	CTNND1	7	71.59	0
324	APC	7	69.28	0
4286	MITF	7	68.87	0
7486	WRN	7	66.74	0
5700	PSMC1	7	64.11	0
11073	TOPBP1	7	63.46	0
5685	PSMA4	7	62.76	0
5708	PSMD2	7	62.76	0
5690	PSMB2	7	62.76	0
6194	RPS6	7	62.07	0
842	CASP9	7	60.78	0
613	BCR	7	60.21	0
9088	PKMYT1	7	59.93	0
6300	MAPK12	7	55.77	0
2242	FES	7	55.62	0
9862	MED24	7	42.62	0
79718	TBL1XR1	7	39.7	0
958	CD40	7	39.67	0
329	BIRC2	7	37.12	0
8556	CDC14A	7	36.11	0
10383	TUBB4B	7	32.67	0
1959	EGR2	7	32.01	0
6604	SMARCD3	7	30.99	0
10018	BCL2L11	7	30.46	0
53358	SHC3	7	29.46	0
5888	RAD51	7	27.12	0
85441	HELZ2	7	27.12	0
5795	PTPRJ	7	21.53	0
9282	MED14	7	21.26	0
399694	SHC4	7	14.6	0
8835	SOCS2	7	14.19	0
2104	ESRRG	7	13.61	0
2057	EPOR	7	13.51	0
1846	DUSP4	7	12.56	0
3337	DNAJB1	7	12.55	0
1850	DUSP8	7	11.51	0
2959	GTF2B	7	6.02	0
2693	GHSR	7	5.35	0
2798	GNRHR	7	5.35	0
1241	LTB4R	7	5.35	0
2837	UTS2R	7	5.35	0
3062	HCRTR2	7	5.35	0
5783	PTPN13	7	3.82	0
94239	H2AFV	7	3.6	0
5916	RARG	7	3.3	0
2971	GTF3A	7	2.2	0
4175	MCM6	7	1.99	0
1163	CKS1B	7	1	0
1164	CKS2	7	1	0
6908	TBP	7	0.69	0
6713	SQLE	6	3239.46	0
2566	GABRG2	6	3105.54	0
5478	PPIA	6	2367.8	0
805	CALM2	6	1997.88	0
2554	GABRA1	6	1880.58	0
2555	GABRA2	6	1880.58	0
4638	MYLK	6	1675.07	0
6548	SLC9A1	6	1597.81	0
7076	TIMP1	6	1198.73	0
775	CACNA1C	6	1070.83	0
3383	ICAM1	6	992.95	0
5592	PRKG1	6	983.14	0
80306	MED28	6	701.51	0
7057	THBS1	6	617.64	0
6868	ADAM17	6	597.02	0
1739	DLG1	6	558.8	0
1080	CFTR	6	419.2	0
6927	HNF1A	6	400.95	0
23770	FKBP8	6	334.97	0
57154	SMURF1	6	264.52	0
10048	RANBP9	6	243.19	0
2066	ERBB4	6	232.24	0
3579	CXCR2	6	221.17	0
5727	PTCH1	6	218.36	0
2934	GSN	6	216.26	0
7546	ZIC2	6	193.79	0
6929	TCF3	6	190.06	0
7272	TTK	6	181.17	0
81027	TUBB1	6	179.83	0
7515	XRCC1	6	174.73	0
8313	AXIN2	6	159.6	0
815	CAMK2A	6	156.76	0
2983	GUCY1B3	6	142.05	0
8543	LMO4	6	140.66	0
7182	NR2C2	6	130.45	0
2288	FKBP4	6	130.12	0
1785	DNM2	6	119.64	0
10413	YAP1	6	117.67	0
5524	PTPA	6	106.1	0
8338	HIST2H2AC	6	99.3	0
4800	NFYA	6	95.7	0
3280	HES1	6	95.52	0
8678	BECN1	6	89.04	0
5333	PLCD1	6	88.98	0
5528	PPP2R5D	6	86.59	0
6839	SUV39H1	6	80.41	0
2623	GATA1	6	76.78	0
10956	OS9	6	75.86	0
5716	PSMD10	6	70.7	0
63967	CLSPN	6	69.25	0
3329	HSPD1	6	66.42	0
2535	FZD2	6	63.59	0
7161	TP73	6	59.17	0
5893	RAD52	6	58.81	0
57761	TRIB3	6	58.02	0
5611	DNAJC3	6	54.67	0
54106	TLR9	6	54.65	0
637	BID	6	54.27	0
4155	MBP	6	53.96	0
3665	IRF7	6	53.89	0
5699	PSMB10	6	50.18	0
4773	NFATC2	6	49.43	0
6688	SPI1	6	48.13	0
355	FAS	6	41.49	0
899	CCNF	6	39.78	0
4361	MRE11A	6	39.51	0
660	BMX	6	39.03	0
1050	CEBPA	6	38.89	0
8881	CDC16	6	37.62	0
5608	MAP2K6	6	37.48	0
641	BLM	6	36.84	0
7277	TUBA4A	6	36.5	0
23162	MAPK8IP3	6	36.49	0
4791	NFKB2	6	36.25	0
4602	MYB	6	35.32	0
9861	PSMD6	6	34.28	0
8871	SYNJ2	6	34.04	0
5684	PSMA3	6	33.64	0
8854	ALDH1A2	6	27.84	0
5426	POLE	6	27.35	0
64426	SUDS3	6	27.35	0
1439	CSF2RB	6	27.15	0
6256	RXRA	6	26.38	0
8290	HIST3H3	6	24.32	0
699	BUB1	6	23.53	0
8856	NR1I2	6	22.48	0
7074	TIAM1	6	21.9	0
9443	MED7	6	20.9	0
23239	PHLPP1	6	18.89	0
5782	PTPN12	6	18.82	0
10963	STIP1	6	17.57	0
10403	NDC80	6	17.04	0
22806	IKZF3	6	15.92	0
81570	CLPB	6	14.5	0
5687	PSMA6	6	14.33	0
6118	RPA2	6	14.06	0
2889	RAPGEF1	6	13.51	0
3937	LCP2	6	13.26	0
27043	PELP1	6	12.83	0
1107	CHD3	6	10.81	0
64682	ANAPC1	6	9.42	0
7158	TP53BP1	6	9.22	0
10294	DNAJA2	6	9.04	0
3301	DNAJA1	6	9.04	0
55466	DNAJA4	6	9.04	0
284	ANGPT1	6	7.89	0
10254	STAM2	6	6.82	0
8503	PIK3R3	6	6.64	0
1848	DUSP6	6	6.57	0
1844	DUSP2	6	6.57	0
1847	DUSP5	6	6.57	0
1849	DUSP7	6	6.57	0
2354	FOSB	6	6.25	0
2355	FOSL2	6	6.25	0
55506	H2AFY2	6	3.48	0
10393	ANAPC10	6	3.4	0
1154	CISH	6	2.64	0
8471	IRS4	6	1.8	0
5915	RARB	6	1.43	0
1028	CDKN1C	6	1.37	0
2002	ELK1	6	1.3	0
7410	VAV2	6	1.19	0
2909	ARHGAP35	6	1.19	0
51478	HSD17B7	5	17612.3	0
10243	GPHN	5	11729.64	0
3615	IMPDH2	5	4917.47	0
8607	RUVBL1	5	3111.31	0
7994	KAT6A	5	2422.95	0
558	AXL	5	1668.24	0
859	CAV3	5	1623.27	0
9261	MAPKAPK2	5	1621.76	0
1543	CYP1A1	5	1581.65	0
1544	CYP1A2	5	1192.95	0
2558	GABRA5	5	1143.09	0
7077	TIMP2	5	1083.69	0
7078	TIMP3	5	970.46	0
183	AGT	5	837.76	0
5054	SERPINE1	5	768.44	0
4889	NPY5R	5	761.62	0
4886	NPY1R	5	761.62	0
6331	SCN5A	5	644.75	0
5733	PTGER3	5	571.35	0
2768	GNA12	5	478	0
23175	LPIN1	5	430.91	0
134	ADORA1	5	395.6	0
328	APEX1	5	351.4	0
50943	FOXP3	5	341.68	0
1903	S1PR3	5	329.84	0
4862	NPAS2	5	266.77	0
1234	CCR5	5	216.18	0
23327	NEDD4L	5	208.18	0
3939	LDHA	5	164.76	0
389	RHOC	5	154.45	0
5575	PRKAR1B	5	154.3	0
8851	CDK5R1	5	147.39	0
NA	NA	5	143.98	0
2778	GNAS	5	141.05	0
2923	PDIA3	5	128.59	0
55294	FBXW7	5	125.12	0
604	BCL6	5	119.02	0
150	ADRA2A	5	117.13	0
5926	ARID4A	5	113.89	0
7097	TLR2	5	103.91	0
5585	PKN1	5	98.55	0
1815	DRD4	5	97.29	0
1813	DRD2	5	97.29	0
54331	GNG2	5	96.18	0
9093	DNAJA3	5	84.36	0
8554	PIAS1	5	84.12	0
5999	RGS4	5	82.68	0
9479	MAPK8IP1	5	82.12	0
4084	MXD1	5	81.66	0
9126	SMC3	5	75.91	0
2034	EPAS1	5	75.73	0
348	APOE	5	69.24	0
30011	SH3KBP1	5	63.94	0
9493	KIF23	5	61.87	0
4086	SMAD1	5	61.4	0
5883	RAD9A	5	58.16	0
3778	KCNMA1	5	57.69	0
406	ARNTL	5	57.13	0
7013	TERF1	5	56.51	0
4436	MSH2	5	56.12	0
6517	SLC2A4	5	55.04	0
1778	DYNC1H1	5	54.23	0
9636	ISG15	5	54.18	0
6188	RPS3	5	53.53	0
6615	SNAI1	5	47.09	0
7343	UBTF	5	46.45	0
4853	NOTCH2	5	45.6	0
4040	LRP6	5	44.69	0
65018	PINK1	5	44.34	0
2697	GJA1	5	42.91	0
9055	PRC1	5	41.27	0
7041	TGFB1I1	5	40.13	0
100506658	OCLN	5	39.95	0
701	BUB1B	5	39.44	0
7006	TEC	5	38.49	0
10253	SPRY2	5	38.34	0
2561	GABRB2	5	38.11	0
2562	GABRB3	5	38.11	0
581	BAX	5	37.5	0
3683	ITGAL	5	33.83	0
83737	ITCH	5	32.24	0
5965	RECQL	5	31.73	0
2063	NR2F6	5	30.34	0
9531	BAG3	5	28.87	0
6097	RORC	5	28.77	0
51741	WWOX	5	27.47	0
1630	DCC	5	25.3	0
5709	PSMD3	5	24.91	0
5714	PSMD8	5	24.91	0
5713	PSMD7	5	24.91	0
10213	PSMD14	5	24.91	0
4303	FOXO4	5	23.9	0
79109	MAPKAP1	5	23.8	0
54583	EGLN1	5	22.03	0
3284	HSD3B2	5	20.7	0
4986	OPRK1	5	20.59	0
3351	HTR1B	5	20.59	0
10808	HSPH1	5	20.14	0
7520	XRCC5	5	19.98	0
861	RUNX1	5	19.42	0
1789	DNMT3B	5	18.77	0
51742	ARID4B	5	16.57	0
2997	GYS1	5	16.26	0
6199	RPS6KB2	5	14.51	0
5598	MAPK7	5	13.88	0
2246	FGF1	5	11.9	0
1565	CYP2D6	5	11.07	0
835	CASP2	5	10.6	0
369	ARAF	5	9.07	0
7145	TNS1	5	9	0
23595	ORC3	5	8.75	0
3000	GUCY2D	5	8.55	0
2984	GUCY2C	5	8.55	0
2986	GUCY2F	5	8.55	0
2982	GUCY1A3	5	8.55	0
4882	NPR2	5	8.55	0
4881	NPR1	5	8.55	0
2977	GUCY1A2	5	8.55	0
10382	TUBB4A	5	8.16	0
27175	TUBG2	5	8.16	0
5584	PRKCI	5	8.06	0
9046	DOK2	5	7.62	0
3659	IRF1	5	7.61	0
285	ANGPT2	5	7.3	0
940	CD28	5	7.05	0
9655	SOCS5	5	6.34	0
5037	PEBP1	5	6.31	0
285220	EPHA6	5	6.24	0
22938	SNW1	5	6.13	0
2886	GRB7	5	5.99	0
391	RHOG	5	5.38	0
27040	LAT	5	5.14	0
1032	CDKN2D	5	5.03	0
5899	RALB	5	4.89	0
10049	DNAJB6	5	4.63	0
11080	DNAJB4	5	4.63	0
59345	GNB4	5	4.46	0
5778	PTPN7	5	4.46	0
2783	GNB2	5	4.46	0
5801	PTPRR	5	4.46	0
84867	PTPN5	5	4.46	0
4739	NEDD9	5	3.78	0
5900	RALGDS	5	3.77	0
9112	MTA1	5	3.49	0
2103	ESRRB	5	2.63	0
9793	CKAP5	5	2.19	0
8395	PIP5K1B	5	2.04	0
8394	PIP5K1A	5	2.04	0
23624	CBLC	5	1.75	0
5218	CDK14	5	1.35	0
2690	GHR	5	1.16	0
122809	SOCS4	5	1.16	0
89869	PLCZ1	5	1.01	0
23396	PIP5K1C	5	1.01	0
84812	PLCD4	5	1.01	0
55851	PSENEN	5	0.64	0
8697	CDC23	5	0.62	0
6598	SMARCB1	5	0.45	0
6934	TCF7L2	5	0.43	0
6599	SMARCC1	5	0.26	0
6602	SMARCD1	5	0.26	0
2648	KAT2A	5	0.12	0
10001	MED6	5	0	0
9441	MED26	5	0	0
1581	CYP7A1	4	5454.09	0
2151	F2RL2	4	3736.73	0
29979	UBQLN1	4	2515.39	0
2052	EPHX1	4	2283.3	0
2023	ENO1	4	2007.74	0
4852	NPY	4	1595.89	0
2159	F10	4	1499.39	0
5621	PRNP	4	1412.1	0
1571	CYP2E1	4	1227.78	0
3827	KNG1	4	783.25	0
9049	AIP	4	632.89	0
8766	RAB11A	4	617.68	0
4544	MTNR1B	4	519.19	0
4543	MTNR1A	4	519.19	0
2261	FGFR3	4	512.87	0
1548	CYP2A6	4	414.94	0
4803	NGF	4	396.76	0
10280	SIGMAR1	4	389.88	0
155	ADRB3	4	368.04	0
3691	ITGB4	4	304.63	0
1634	DCN	4	248.94	0
9101	USP8	4	228.14	0
3745	KCNB1	4	217.28	0
6347	CCL2	4	216.34	0
7298	TYMS	4	206.3	0
4633	MYL2	4	205.65	0
2911	GRM1	4	203.85	0
5337	PLD1	4	188.29	0
9184	BUB3	4	184.89	0
59341	TRPV4	4	175.15	0
3949	LDLR	4	174.9	0
5494	PPM1A	4	156	0
51176	LEF1	4	137.13	0
811	CALR	4	116.48	0
8665	EIF3F	4	102.99	0
5516	PPP2CB	4	100.17	0
7222	TRPC3	4	97.21	0
4149	MAX	4	89.79	0
5048	PAFAH1B1	4	73.47	0
2274	FHL2	4	73.4	0
5328	PLAU	4	71.23	0
8772	FADD	4	71.14	0
7124	TNF	4	66.11	0
2177	FANCD2	4	65.15	0
9451	EIF2AK3	4	64.11	0
7011	TEP1	4	61.46	0
4793	NFKBIB	4	60.17	0
10369	CACNG2	4	55.25	0
7471	WNT1	4	55.24	0
7048	TGFBR2	4	52.09	0
3737	KCNA2	4	51.45	0
10746	MAP3K2	4	51.28	0
9894	TELO2	4	51.18	0
84254	CAMKK1	4	51.05	0
123169	LEO1	4	50.17	0
22919	MAPRE1	4	48.53	0
11198	SUPT16H	4	47.74	0
10155	TRIM28	4	46.59	0
10614	HEXIM1	4	46.58	0
8837	CFLAR	4	45.35	0
1977	EIF4E	4	45.34	0
1647	GADD45A	4	42.96	0
5573	PRKAR1A	4	40.64	0
3558	IL2	4	40.4	0
9368	SLC9A3R1	4	40.38	0
58	ACTA1	4	40.31	0
839	CASP6	4	37.83	0
79365	BHLHE41	4	36.93	0
10987	COPS5	4	36.43	0
3728	JUP	4	36.35	0
5613	PRKX	4	36.06	0
4686	NCBP1	4	35.04	0
9575	CLOCK	4	34.98	0
7094	TLN1	4	34.06	0
440275	EIF2AK4	4	33.99	0
7334	UBE2N	4	32.42	0
4802	NFYC	4	32.35	0
10576	CCT2	4	30.97	0
5777	PTPN6	4	29.95	0
5163	PDK1	4	28.9	0
1129	CHRM2	4	27.09	0
5520	PPP2R2A	4	26.37	0
8829	NRP1	4	25.85	0
6477	SIAH1	4	25.65	0
1616	DAXX	4	25.43	0
821	CANX	4	25.31	0
9817	KEAP1	4	24.92	0
4734	NEDD4	4	24.47	0
3663	IRF5	4	22.74	0
4301	MLLT4	4	21.96	0
8473	OGT	4	21.46	0
8484	GALR3	4	20.59	0
59340	HRH4	4	20.59	0
11255	HRH3	4	20.59	0
3361	HTR5A	4	20.59	0
4987	OPRL1	4	20.59	0
57413	TMIGD3	4	20.59	0
10803	CCR9	4	20.59	0
1268	CNR1	4	20.59	0
1269	CNR2	4	20.59	0
1814	DRD3	4	20.59	0
152	ADRA2C	4	20.59	0
3561	IL2RG	4	20.52	0
5071	PARK2	4	20.28	0
166	AES	4	20.26	0
5423	POLB	4	20.04	0
2962	GTF2F1	4	19.64	0
51726	DNAJB11	4	19.6	0
7088	TLE1	4	18.95	0
1831	TSC22D3	4	17.94	0
3313	HSPA9	4	16.89	0
9968	MED12	4	15.99	0
5315	PKM	4	15.43	0
5927	KDM5A	4	15.01	0
4145	MATK	4	14.76	0
5321	PLA2G4A	4	14.68	0
3159	HMGA1	4	14.24	0
578	BAK1	4	14.11	0
6461	SHB	4	14.06	0
5717	PSMD11	4	13.79	0
51588	PIAS4	4	13.19	0
9063	PIAS2	4	13.19	0
401551	WDR38	4	13.05	0
4684	NCAM1	4	12.27	0
57506	MAVS	4	12.08	0
87	ACTN1	4	11.39	0
10782	ZNF274	4	10.99	0
3306	HSPA2	4	10.88	0
64427	TTC31	4	10.28	0
10598	AHSA1	4	10.28	0
130872	AHSA2	4	10.28	0
23331	TTC28	4	10.28	0
100885850	PTGES3L-AARSD1	4	10.28	0
54970	TTC12	4	10.28	0
405	ARNT	4	9.71	0
843	CASP10	4	9.4	0
10284	SAP18	4	9.36	0
7181	NR2C1	4	9.1	0
25970	SH2B1	4	8.71	0
5692	PSMB4	4	8.08	0
2888	GRB14	4	7.63	0
7187	TRAF3	4	7.38	0
2115	ETV1	4	7.37	0
80854	SETD7	4	6.42	0
5710	PSMD4	4	6.32	0
23198	PSME4	4	6.32	0
7270	TTF1	4	6.26	0
8467	SMARCA5	4	6.26	0
10498	CARM1	4	5.95	0
153	ADRB1	4	5.61	0
23476	BRD4	4	5.33	0
4189	DNAJB9	4	5.33	0
5792	PTPRF	4	4.75	0
8643	PTCH2	4	4.58	0
580	BARD1	4	4.54	0
9448	MAP4K4	4	4.53	0
9794	MAML1	4	4.52	0
23542	MAPK8IP2	4	4.49	0
257397	TAB3	4	4.33	0
5901	RAN	4	4.27	0
8021	NUP214	4	4.11	0
51422	PRKAG2	4	4	0
22800	RRAS2	4	3.96	0
5364	PLXNB1	4	3.87	0
5296	PIK3R2	4	3.82	0
5481	PPID	4	3.71	0
5001	ORC5	4	3.65	0
4916	NTRK3	4	3.52	0
7128	TNFAIP3	4	3.33	0
5786	PTPRA	4	3.3	0
6595	SMARCA2	4	3.11	0
5536	PPP5C	4	2.88	0
5063	PAK3	4	2.84	0
90427	BMF	4	2.74	0
6307	MSMO1	4	2.58	0
468	ATF4	4	2.49	0
6795	AURKC	4	2.38	0
6605	SMARCE1	4	2.07	0
8805	TRIM24	4	1.96	0
7025	NR2F1	4	1.7	0
6612	SUMO3	4	1.56	0
25822	DNAJB5	4	1.51	0
11144	DMC1	4	1.48	0
190	NR0B1	4	1.35	0
56623	INPP5E	4	1.01	0
5305	PIP4K2A	4	1.01	0
3633	INPP5B	4	1.01	0
3645	INSRR	4	1.01	0
4952	OCRL	4	1.01	0
138429	PIP5KL1	4	1.01	0
6670	SP3	4	0.96	0
3642	INSM1	4	0.96	0
8986	RPS6KA4	4	0.53	0
23426	GRIP1	4	0.32	0
3566	IL4R	4	0.27	0
5884	RAD17	4	0.2	0
6594	SMARCA1	4	0.12	0
25855	BRMS1	4	0.12	0
55824	PAG1	4	0.09	0
51003	MED31	4	0	0
6720	SREBF1	4	0	0
3619	INCENP	4	0	0
1052	CEBPD	4	0	0
8649	LAMTOR3	4	0	0
1555	CYP2B6	3	8928.13	0
6869	TACR1	3	3181	0
1717	DHCR7	3	2840.99	0
462	SERPINC1	3	2556.14	0
2677	GGCX	3	2214.48	0
55902	ACSS2	3	1643.77	0
5345	SERPINF2	3	1629.64	0
6426	SRSF1	3	1620.54	0
7295	TXN	3	1593.74	0
191	AHCY	3	1574.7	0
2058	EPRS	3	1342.45	0
4513	MT-CO2	3	935.34	0
2335	FN1	3	892.43	0
11143	KAT7	3	766.36	0
783	CACNB2	3	678.37	0
54205	CYCS	3	662.17	0
5329	PLAUR	3	471.82	0
2327	FMO2	3	396.05	0
2326	FMO1	3	396.05	0
2329	FMO4	3	396.05	0
2328	FMO3	3	396.05	0
3156	HMGCR	3	378.75	0
471	ATIC	3	320.56	0
3710	ITPR3	3	256.95	0
3958	LGALS3	3	251.18	0
2155	F7	3	235.65	0
975	CD81	3	216.41	0
9039	UBA3	3	213.99	0
23135	KDM6B	3	204.38	0
4282	MIF	3	195.37	0
3814	KISS1	3	192.99	0
3576	CXCL8	3	191.31	0
55236	UBA6	3	185.47	0
218	ALDH3A1	3	166.56	0
818	CAMK2G	3	166.46	0
10398	MYL9	3	150.86	0
5359	PLSCR1	3	141.52	0
6356	CCL11	3	124.08	0
3630	INS	3	111.74	0
6531	SLC6A3	3	109.65	0
9463	PICK1	3	106.86	0
4738	NEDD8	3	99.79	0
22926	ATF6	3	96.1	0
8883	NAE1	3	92.5	0
3676	ITGA4	3	88.83	0
114548	NLRP3	3	87.15	0
4323	MMP14	3	84.83	0
9456	HOMER1	3	83.5	0
1373	CPS1	3	81	0
6385	SDC4	3	76.53	0
7039	TGFA	3	76.49	0
10419	PRMT5	3	69.15	0
2316	FLNA	3	63.43	0
2872	MKNK2	3	62.3	0
26060	APPL1	3	61	0
5424	POLD1	3	60.35	0
4435	CITED1	3	60.33	0
2626	GATA4	3	59.72	0
7098	TLR3	3	54.44	0
11091	WDR5	3	51.53	0
3695	ITGB7	3	51.43	0
3276	PRMT1	3	50.51	0
6383	SDC2	3	50.29	0
817	CAMK2D	3	48.98	0
10856	RUVBL2	3	47.61	0
8195	MKKS	3	43.62	0
51684	SUFU	3	41.91	0
10112	KIF20A	3	41.32	0
2719	GPC3	3	41.17	0
3553	IL1B	3	40.92	0
7220	TRPC1	3	40.12	0
29127	RACGAP1	3	39.94	0
4116	MAGOH	3	39.82	0
5080	PAX6	3	39.52	0
4691	NCL	3	39.29	0
11124	FAF1	3	38.52	0
1938	EEF2	3	38.19	0
26986	PABPC1	3	38.11	0
5045	FURIN	3	37.13	0
2162	F13A1	3	36.99	0
7042	TGFB2	3	36.54	0
6262	RYR2	3	36.4	0
5495	PPM1B	3	36.06	0
23774	BRD1	3	35.99	0
2906	GRIN2D	3	35.18	0
55011	PIH1D1	3	33.24	0
9149	DYRK1B	3	32.75	0
3614	IMPDH1	3	32.4	0
25937	WWTR1	3	32.24	0
2893	GRIA4	3	31.76	0
10919	EHMT2	3	31.74	0
10210	TOPORS	3	31.26	0
7253	TSHR	3	30.69	0
7490	WT1	3	30.31	0
51701	NLK	3	29.52	0
10592	SMC2	3	29.51	0
51284	TLR7	3	27.64	0
467	ATF3	3	27.5	0
5534	PPP3R1	3	27.32	0
2101	ESRRA	3	27.02	0
639	PRDM1	3	26.63	0
84152	PPP1R1B	3	25.24	0
4772	NFATC1	3	24.63	0
6453	ITSN1	3	24.15	0
11065	UBE2C	3	24.11	0
2645	GCK	3	23.7	0
2197	FAU	3	23.53	0
9467	SH3BP5	3	22.46	0
10121	ACTR1A	3	21.61	0
238	ALK	3	21.58	0
335	APOA1	3	21.43	0
8405	SPOP	3	21.09	0
1740	DLG2	3	20.66	0
658	BMPR1B	3	20.59	0
64127	NOD2	3	19.82	0
90480	GADD45GIP1	3	19.14	0
6709	SPTAN1	3	19.1	0
8175	SF3A2	3	19.01	0
8874	ARHGEF7	3	18.93	0
7431	VIM	3	18.47	0
7416	VDAC1	3	18.25	0
10320	IKZF1	3	17.31	0
4613	MYCN	3	17.05	0
2150	F2RL1	3	16.36	0
6749	SSRP1	3	16.23	0
6591	SNAI2	3	16.18	0
9972	NUP153	3	16.1	0
8555	CDC14B	3	15.93	0
5532	PPP3CB	3	15.82	0
5530	PPP3CA	3	15.82	0
11184	MAP4K1	3	15.3	0
9627	SNCAIP	3	15.06	0
3290	HSD11B1	3	14.99	0
25898	RCHY1	3	14.78	0
27429	HTRA2	3	14.68	0
8239	USP9X	3	14.61	0
11113	CIT	3	14.43	0
5229	PGGT1B	3	14.43	0
29924	EPN1	3	14.19	0
4801	NFYB	3	13.27	0
3621	ING1	3	13.08	0
3162	HMOX1	3	13.06	0
55140	ELP3	3	13	0
8452	CUL3	3	12.75	0
5724	PTAFR	3	12.46	0
3298	HSF2	3	12.39	0
826	CAPNS1	3	12.11	0
2060	EPS15	3	12.1	0
23168	RTF1	3	11.37	0
5587	PRKD1	3	11.2	0
3059	HCLS1	3	11.18	0
3678	ITGA5	3	11.16	0
23091	ZC3H13	3	11	0
1660	DHX9	3	10.75	0
650	BMP2	3	10.71	0
63827	BCAN	3	10.65	0
688	KLF5	3	10.64	0
27044	SND1	3	10.63	0
3093	UBE2K	3	10.57	0
1973	EIF4A1	3	10.34	0
7185	TRAF1	3	10.04	0
10928	RALBP1	3	9.91	0
5739	PTGIR	3	9.89	0
10146	G3BP1	3	9.88	0
10664	CTCF	3	9.85	0
3638	INSIG1	3	9.38	0
56950	SMYD2	3	8.95	0
10038	PARP2	3	8.92	0
5715	PSMD9	3	8.82	0
90134	KCNH7	3	8.15	0
23415	KCNH4	3	8.15	0
3756	KCNH1	3	8.15	0
23416	KCNH3	3	8.15	0
131096	KCNH8	3	8.15	0
27133	KCNH5	3	8.15	0
81033	KCNH6	3	8.15	0
4775	NFATC3	3	7.86	0
27161	AGO2	3	7.77	0
26523	AGO1	3	7.77	0
7276	TTR	3	7.71	0
1390	CREM	3	7.32	0
79155	TNIP2	3	7.28	0
28988	DBNL	3	7.27	0
22861	NLRP1	3	6.75	0
9869	SETDB1	3	6.6	0
5885	RAD21	3	6.43	0
3434	IFIT1	3	6.13	0
3685	ITGAV	3	5.93	0
7268	TTC4	3	5.68	0
55743	CHFR	3	5.66	0
6917	TCEA1	3	4.98	0
84447	SYVN1	3	4.92	0
5694	PSMB6	3	4.86	0
9351	SLC9A3R2	3	4.8	0
122953	JDP2	3	4.76	0
4904	YBX1	3	4.73	0
85479	DNAJC5B	3	4.63	0
80273	GRPEL1	3	4.63	0
80331	DNAJC5	3	4.63	0
134266	GRPEL2	3	4.63	0
5327	PLAT	3	4.47	0
9495	AKAP5	3	4.44	0
7322	UBE2D2	3	4.31	0
10874	NMU	3	4.28	0
129521	NMS	3	4.28	0
7337	UBE3A	3	4.05	0
22808	MRAS	3	4.04	0
53632	PRKAG3	3	4	0
8682	PEA15	3	3.85	0
9360	PPIG	3	3.71	0
4820	NKTR	3	3.71	0
10465	PPIH	3	3.71	0
51567	TDP2	3	3.71	0
55664	CDC37L1	3	3.71	0
285755	PPIL6	3	3.71	0
79784	MYH14	3	3.46	0
4216	MAP3K4	3	3.41	0
51400	PPME1	3	3.25	0
50807	ASAP1	3	3.18	0
5519	PPP2R1B	3	3.17	0
8099	CDK2AP1	3	3.11	0
6355	CCL8	3	2.86	0
6354	CCL7	3	2.86	0
6309	SC5D	3	2.82	0
10025	MED16	3	2.74	0
5753	PTK6	3	2.73	0
10555	AGPAT2	3	2.68	0
9610	RIN1	3	2.54	0
114609	TIRAP	3	2.46	0
4322	MMP13	3	2.42	0
4314	MMP3	3	2.42	0
382	ARF6	3	2.41	0
3300	DNAJB2	3	2.39	0
29945	ANAPC4	3	2.38	0
81030	ZBP1	3	2.02	0
2059	EPS8	3	1.99	0
8289	ARID1A	3	1.83	0
50855	PARD6A	3	1.74	0
2560	GABRB1	3	1.59	0
7867	MAPKAPK3	3	1.59	0
4689	NCF4	3	1.59	0
5984	RFC4	3	1.56	0
5983	RFC3	3	1.56	0
387082	SUMO4	3	1.56	0
5985	RFC5	3	1.56	0
7156	TOP3A	3	1.36	0
1584	CYP11B1	3	1.27	0
1585	CYP11B2	3	1.27	0
9047	SH2D2A	3	1.27	0
79991	OBFC1	3	1.24	0
4091	SMAD6	3	1.19	0
9814	SFI1	3	1.14	0
1033	CDKN3	3	0.96	0
57504	MTA3	3	0.96	0
9542	NRG2	3	0.91	0
4352	MPL	3	0.89	0
50814	NSDHL	3	0.89	0
3594	IL12RB1	3	0.89	0
7855	FZD5	3	0.86	0
27289	RND1	3	0.76	0
8601	RGS20	3	0.73	0
5718	PSMD12	3	0.73	0
5719	PSMD13	3	0.73	0
27148	STK36	3	0.72	0
10474	TADA3	3	0.69	0
8726	EED	3	0.68	0
23512	SUZ12	3	0.68	0
4292	MLH1	3	0.66	0
4438	MSH4	3	0.66	0
4855	NOTCH4	3	0.64	0
2557	GABRA4	3	0.6	0
2559	GABRA6	3	0.6	0
55715	DOK4	3	0.6	0
10298	PAK4	3	0.48	0
3656	IRAK2	3	0.44	0
8914	TIMELESS	3	0.43	0
1896	EDA	3	0.42	0
8751	ADAM15	3	0.36	0
11099	PTPN21	3	0.34	0
916	CD3E	3	0.32	0
6096	RORB	3	0.31	0
3587	IL10RA	3	0.27	0
9180	OSMR	3	0.27	0
6452	SH3BP2	3	0.24	0
1493	CTLA4	3	0.17	0
2005	ELK4	3	0.17	0
2212	FCGR2A	3	0.14	0
11108	PRDM4	3	0.12	0
64422	ATG3	3	0.12	0
3017	HIST1H2BD	3	0.12	0
8819	SAP30	3	0.12	0
255626	HIST1H2BA	3	0.12	0
85236	HIST1H2BK	3	0.12	0
8970	HIST1H2BJ	3	0.12	0
54815	GATAD2A	3	0.12	0
9643	MORF4L2	3	0.12	0
8346	HIST1H2BI	3	0.12	0
8341	HIST1H2BN	3	0.12	0
8340	HIST1H2BL	3	0.12	0
925	CD8A	3	0.09	0
919	CD247	3	0.09	0
23533	PIK3R5	3	0.06	0
23594	ORC6	3	0	0
91768	CABLES1	3	0	0
5427	POLE2	3	0	0
6655	SOS2	3	0	0
4683	NBN	3	0	0
9601	PDIA4	3	0	0
638	BIK	3	0	0
10645	CAMKK2	3	0	0
3310	HSPA6	3	0	0
5366	PMAIP1	3	0	0
8976	WASL	3	0	0
7168	TPM1	3	0	0
5810	RAD1	3	0	0
5583	PRKCH	3	0	0
56924	PAK6	3	0	0
84335	AKT1S1	3	0	0
7171	TPM4	3	0	0
4624	MYH6	3	0	0
7169	TPM2	3	0	0
55588	MED29	3	0	0
9412	MED21	3	0	0
23389	MED13L	3	0	0
84246	MED10	3	0	0
112950	MED8	3	0	0
81857	MED25	3	0	0
219541	MED19	3	0	0
10892	MALT1	3	0	0
23085	ERC1	3	0	0
9196	KCNAB3	3	0	0
3739	KCNA4	3	0	0
3754	KCNF1	3	0	0
4794	NFKBIE	3	0	0
5155	PDGFB	3	0	0
5308	PITX2	3	0	0
10362	HMG20B	3	0	0
10661	KLF1	3	0	0
2074	ERCC6	3	0	0
2516	NR5A1	3	0	0
6872	TAF1	3	0	0
54797	MED18	3	0	0
3953	LEPR	3	0	0
3009	HIST1H1B	3	0	0
7852	CXCR4	3	0	0
9138	ARHGEF1	3	0	0
7155	TOP2B	3	0	0
825	CAPN3	3	0	0
9969	MED13	3	0	0
51317	PHF21A	3	0	0
55758	RCOR3	3	0	0
1058	CENPA	3	0	0
29882	ANAPC2	3	0	0
51529	ANAPC11	3	0	0
10370	CITED2	3	0	0
3570	IL6R	3	0	0
7170	TPM3	3	0	0
8514	KCNAB2	3	0	0
55914	ERBIN	3	0	0
4626	MYH8	3	0	0
27113	BBC3	3	0	0
7881	KCNAB1	3	0	0
9312	KCNB2	3	0	0
1508	CTSB	2	1591	0
4363	ABCC1	2	1591	0
84532	ACSS1	2	851.39	0
1374	CPT1A	2	716.08	0
1195	CLK1	2	306.29	0
6318	SERPINB4	2	217.41	0
4860	PNP	2	214.48	0
2915	GRM5	2	130.71	0
2194	FASN	2	75.06	0
1803	DPP4	2	72.29	0
5243	ABCB1	2	33.92	0
682	BSG	2	24.5	0
9682	KDM4A	2	13.74	0
6187	RPS2	2	7.01	0
7442	TRPV1	2	6.24	0
132	ADK	2	6.09	0
176	ACAN	2	4.32	0
3758	KCNJ1	2	3.14	0
7381	UQCRB	2	2.96	0
1592	CYP26A1	2	2.7	0
1528	CYB5A	2	1.73	0
3985	LIMK2	2	1.19	0
8877	SPHK1	2	0.16	0
4953	ODC1	2	0	0
952	CD38	2	0	0
781	CACNA2D1	2	0	0
2152	F3	2	0	0
5230	PGK1	2	0	0
7862	BRPF1	2	0	0
2936	GSR	1	0	0
3991	LIPE	1	0	0
479	ATP12A	1	0	0
3417	IDH1	1	0	0
6866	TAC3	1	0	0
9833	MELK	1	0	0
6326	SCN2A	1	0	0
649	BMP1	1	0	0
1475	CSTA	1	0	0
5836	PYGL	1	0	0
10988	METAP2	1	0	0
231	AKR1B1	1	0	0
57551	TAOK1	1	0	0
9429	ABCG2	1	0	0
23463	ICMT	1	0	0
6863	TAC1	1	0	0
240	ALOX5	1	0	0
6732	SRPK1	1	0	0
8913	CACNA1G	1	0	0
760	CA2	1	0	0
6401	SELE	1	0	0
4160	MC4R	1	0	0
2621	GAS6	1	0	0
1675	CFD	1	0	0
2539	G6PD	1	0	0
11069	RAPGEF4	1	0	0
